# Supplementary material for: Isolation and Characterization of Poecistasin, an Anti-Thrombotic Antistasin-Type Serine Protease Inhibitor from Leech Poecilobdella manillensis
Source: PubMed Central journal article supplement (PMC6265900; doi:10.3390/toxins10110429), 2018-10-26
Supplement: toxins-10-00429-s001.pdf [file toxins-10-00429-s001.pdf]

# Supplementary Materials: Isolation and Characterization of Poecistasin, an Anti-Thrombotic Antistatin-Type Serine Protease Inhibitor from Leech *Poecilobdella manillensis*

Xiaopeng Tang, Mengrou Chen, Zilei Duan, James Mwangi, Pengpeng Li and Ren Lai

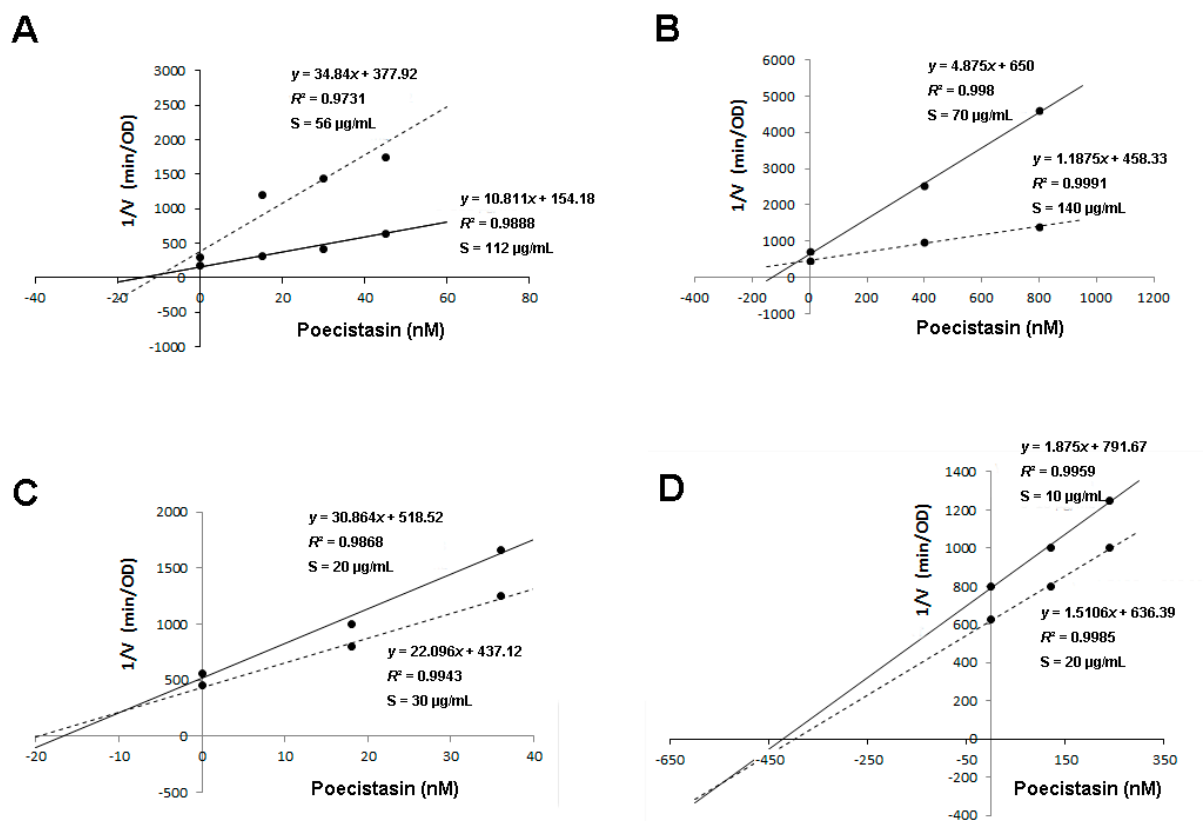

**Figure S1.** Dixon plot curve to calculate the  $K_i$  of poecistasin to inhibit proteases. Different concentrations of substrates for FXIIa, kallikrein, trypsin, and elastase were used to react with the corresponding enzymes, respectively. Dixon plot curve to calculate the  $K_i$  of poecistasin to inhibit FXIIa (A), kallikrein (B), trypsin (C), and elastase (D). The concentrations of substrate (S) and poecistasin were indicated in figure.

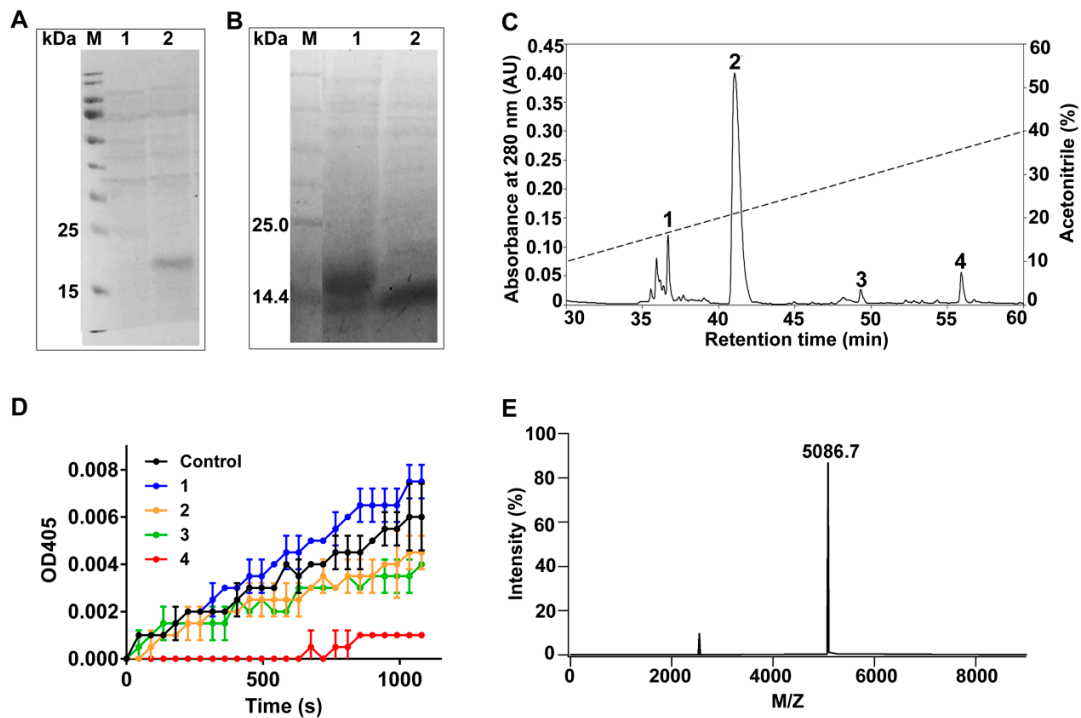

**Figure S2.** Recombinant expression and purification of poecistasin. (A) SDS-PAGE analysis of production of poecistasin fusion protein after the induction by 1 mM IPTG for 6 h in a 80-rpm shaker at 28°C. M, protein markers; lane 1, non-induced; lane 2, induced. (B) SDS-PAGE analysis of fraction of Ni<sup>2+</sup> affinity chromatography column of supernatant fraction contained poecistasin fusion protein after cutting by rTEV protease (5 U/μL) in reaction buffer at 28°C for 14 h. M, protein marker; Lane 1, the supernatant fraction of Ni<sup>2+</sup> affinity chromatography column; Lane 2, the fraction of "lane 1" after cutting by rTEV protease. (C) Purification of recombinant poecistasin by RP-HPLC C<sub>8</sub> column by monitoring at 280 nm. The dashed line represents a line gradient of acetonitrile from 10 to 40% over 30 min. (D) The peaks of "C" were used to test FXIIa inhibitory activity. (E) Mass spectrometry analysis of recombinant poecistasin (peak 4) by MALDI-TOF-MS.
